# Supplementary material for: New findings on the fungal species Tricholoma matsutake from Ukraine, and revision of its taxonomy and biogeography based on multilocus phylogenetic analyses
Source: PubMed Central journal article supplement — Mycoscience. 2022 Sep 30;63(5):197–214. doi: 10.47371/mycosci.2022.07.004 (PMC10033251; doi:10.47371/mycosci.2022.07.004), 2022-09-30
Supplement: MYC-63-197-s01.pdf [file MYC-63-197-s01.pdf]

Supplementary Table S1. List of DNA sequences obtained in the present study

| Latin name                  | Sample ID                  | Country     | ID of deposited DNA sequences in each following locus |               |             |                        |             |             |              |             |              |
|-----------------------------|----------------------------|-------------|-------------------------------------------------------|---------------|-------------|------------------------|-------------|-------------|--------------|-------------|--------------|
|                             |                            |             | nuc rDNA ITS                                          | nuc rDNA IGS1 | <i>rpb2</i> | $\beta_2$ tubulin gene | mt rDNA SSU | <i>atp6</i> | <i>gapdh</i> | <i>tef1</i> | <i>megB1</i> |
| <i>Tricholoma matsutake</i> | AY-2200915-001             | Ukraine     | LC684325                                              | LC684350      | LC684377    | LC684437               | LC684465    | LC684507    | LC684424     | LC684389    | LC684515     |
| <i>T. matsutake</i>         | Ishida F-0247              | Sweden      | LC684296                                              | LC684329      | LC684365    | LC684446               | LC684485    | LC684488    |              | LC684385    |              |
| <i>T. matsutake</i>         | Ishida F-0315              | Sweden      | LC684310                                              | LC684330      | LC684371    | LC684450               | LC684483    | LC684506    | LC684422     | LC684387    | LC684514     |
| <i>T. matsutake</i>         | AT-0925                    | Sweden      | LC684286                                              |               |             |                        |             |             |              |             |              |
| <i>T. matsutake</i>         | AY-2040800-001             | Finland     | LC684326                                              | LC684349      | LC684369    | LC684448               | LC684482    | LC684492    | LC684428     | LC684390    |              |
| <i>T. matsutake</i>         | AY-2070925-001 (=Tn-FIN1)  | Finland     | LC684306                                              | LC684348      | LC684384    | LC684440               | LC684481    | LC684505    | LC684433     | LC684409    |              |
| <i>T. matsutake</i>         | AY-2040400-001             | Bhutan      | LC684321                                              | LC684347      |             |                        |             |             | LC684421     |             |              |
| <i>T. matsutake</i>         | AY-1981000-002 (= BH1)     | Bhutan      | LC684309                                              | LC684346      | LC684368    | LC684463               | LC684480    | LC684503    | LC684427     | LC684408    | LC684512     |
| <i>T. matsutake</i>         | Narimatsu S-1              | Bhutan      | LC684322                                              | LC684355      |             | LC684457               |             |             |              | LC684407    |              |
| <i>T. matsutake</i>         | Narimatsu S-2              | Bhutan      | LC684317                                              | LC684354      |             | LC684460               |             |             |              | LC684399    |              |
| <i>T. matsutake</i>         | Narimatsu S-3-1            | Bhutan      | LC684324                                              | LC684353      |             | LC684456               |             |             |              | LC684397    |              |
| <i>T. matsutake</i>         | Narimatsu S-3-2            | Bhutan      | LC684308                                              | LC684352      |             | LC684458               |             |             |              | LC684396    |              |
| <i>T. matsutake</i>         | AY-1980831-001             | China       | LC684307                                              | LC684345      | LC684367    | LC684444               | LC684484    | LC684493    | LC684419     | LC684392    |              |
| <i>T. matsutake</i>         | AY-1981000-001 (= CH1)     | China       | LC684315                                              | LC684344      | LC684364    | LC684438               | LC684479    | LC684504    | LC684420     | LC684395    |              |
| <i>T. matsutake</i>         | Chi4 (= CH-HE)             | China       | LC684285                                              |               |             |                        |             |             |              |             |              |
| <i>T. matsutake</i>         | Chi6 (= CH-YU1)            | China       | LC684284                                              |               |             |                        |             |             |              |             |              |
| <i>T. matsutake</i>         | AY-1981000-003 (= NK1)     | North Korea | LC684304                                              | LC684343      |             |                        | LC684478    |             | LC684417     |             |              |
| <i>T. matsutake</i>         | AT-0924 (= KFRI 432)       | South Korea | LC684311                                              | LC684359      | LC684376    | LC684461               | LC684477    | LC684490    | LC684436     | LC684400    |              |
| <i>T. matsutake</i>         | AY-2150919-001             | Japan       | LC684316                                              | LC684342      | LC684380    | LC684439               | LC684474    | LC684496    | LC684416     | LC684394    | LC684512     |
| <i>T. matsutake</i>         | AY-2101004-001             | Japan       | LC684323                                              | LC684341      | LC684363    | LC684455               | LC684486    | LC684502    | LC684423     | LC684406    |              |
| <i>T. matsutake</i>         | AY-1981023-003             | Japan       | LC684303                                              |               |             |                        |             |             |              |             |              |
| <i>T. matsutake</i>         | AY-2051104-002             | Japan       | LC684302                                              |               |             |                        |             |             |              |             |              |
| <i>T. matsutake</i>         | AY-2071023-002             | Japan       | LC684301                                              | LC684357      | LC684362    | LC684459               | LC684473    | LC684501    | LC684426     | LC684402    |              |
| <i>T. matsutake</i>         | Y1 (= NBRC 33136)          | Japan       | LC684281                                              |               |             |                        |             |             |              |             |              |
| <i>T. matsutake</i>         | TUA-84                     | Japan       | LC574921*                                             | LC684338      | LC586870*   | LC684454               | LC636420*   | LC636282*   | LC636271*    | LC636261*   |              |
| <i>T. matsutake</i>         | TUA-115                    | Japan       | LC684295                                              | LC684337      | LC636240*   | LC684442               | LC636415*   | LC684494    | LC684415     | LC684403    | LC684510     |
| <i>T. matsutake</i>         | AY-2131013-001             | Japan       | LC684294                                              | LC684336      | LC684370    | LC684451               | LC684469    | LC684498    | LC684414     | LC684388    | LC684509     |
| <i>T. matsutake</i>         | AT-0740                    | Japan       | LC684290                                              |               |             |                        |             |             |              |             |              |
| <i>T. matsutake</i>         | AT-0748                    | Japan       | LC684288                                              |               |             |                        |             |             |              |             |              |
| <i>T. matsutake</i>         | AY-2041007-002             | Japan       | LC684300                                              |               |             |                        |             |             |              |             |              |
| <i>T. matsutake</i>         | AY-2181005-001             | Japan       | LC684327                                              | LC684340      | LC684373    | LC684453               | LC684472    | LC684500    | LC684432     | LC684393    | LC684511     |
| <i>T. matsutake</i>         | AY-2021027-001             | Japan       | LC684299                                              |               |             |                        |             |             |              |             |              |
| <i>T. matsutake</i>         | AY-2071101-001             | Japan       | LC684297                                              |               |             |                        |             |             |              |             |              |
| <i>T. matsutake</i>         | AT-0742                    | Japan       | LC684289                                              |               |             |                        |             |             |              |             |              |
| <i>T. matsutake</i>         | AY-2191104-001             | Japan       | LC684298                                              | LC684339      | LC684375    | LC684449               | LC684470    | LC684499    | LC684429     | LC684398    |              |
| <i>T. magnivelare</i>       | AY-2080307-001             | Canada      | LC684312                                              | LC684333      | LC684361    | LC684445               | LC684487    | LC684495    | LC684412     | LC684386    | LC684508     |
| <i>T. mesoamericanum</i>    | AY-1981000-004 (= MX1)     | Mexico      | LC684313                                              |               | LC684383    |                        | LC685348    |             |              |             |              |
| <i>T. murrillianum</i>      | AT-0913 (= Tp-C3)          | Canada      | LC684287                                              |               |             |                        |             |             |              |             |              |
| <i>T. murrillianum</i>      | AY-2080100-001             | Canada      | LC684292                                              | LC684358      | LC684379    |                        | LC684475    |             | LC684425     | LC684401    |              |
| <i>T. murrillianum</i>      | AY-2071018-001             | Canada      | LC684332                                              | LC684366      | LC684452    | LC684464               | LC684491    | LC684418    | LC684418     | LC684391    |              |
| <i>T. anatolicum</i>        | AY-1981000-005 (= MC1)     | Morocco     | LC684318                                              | LC684331      | LC684382    |                        | LC685347    |             | LC684434     |             |              |
| <i>T. anatolicum</i>        | AY-2061109-001 (= S-3-2-1) | Turkey      | LC684291                                              |               |             |                        |             |             |              |             |              |
| <i>T. anatolicum</i>        | AY-2061108-004 (= S-2-2-1) | Turkey      | LC684320                                              | LC684328      | LC684374    | LC684443               | LC684471    | LC684489    | LC684411     | LC684410    |              |
| <i>T. fulvocastaneum</i>    | AY-2110606                 | Laos        | LC684293                                              | LC684356      | LC684378    | LC684462               | LC684466    |             | LC684435     | LC684404    |              |
| <i>T. bakamatsutake</i>     | AY-2080800-001             | China       | LC684319                                              | LC684351      | LC684372    | LC684447               | LC684468    |             | LC684431     |             |              |
| <i>T. bakamatsutake</i>     | AY-2050912-001             | Japan       | LC684314                                              | LC684334      | LC684381    |                        | LC684476    |             | LC684430     |             |              |
| <i>T. bakamatsutake</i>     | AT-0760                    | Japan       | LC684282                                              |               |             |                        |             |             |              |             |              |
| <i>T. bakamatsutake</i>     | AY-2041007-003             | Japan       | LC684283                                              |               |             |                        |             |             |              |             |              |
| <i>T. bakamatsutake</i>     | AY-2071001-002             | Japan       | LC684305                                              | LC684335      | LC684360    | LC684441               | LC684467    | LC684497    | LC684413     | LC684405    |              |

Specimens of *T. matsutake* AY-2051104-001, AY-2051104-003, AY-2101020-001, AY-2041007-001, AY-2101021-002, *T. anatolicum* AY-1981000-006, AY-2061109-002, and *T. fulvocastaneum* AY-2091112-001 listed in Table 1 were only checked the restriction fragment patterns of their PCR amplicons of nuc rDNA ITS regions (data not shown).

\*These sequences were already reported by Aoki et al. (2021, 2022).
