# Supplementary material for: New findings on the fungal species Tricholoma matsutake from Ukraine, and revision of its taxonomy and biogeography based on multilocus phylogenetic analyses
Source: PubMed Central journal article supplement — Mycoscience. 2022 Sep 30;63(5):197–214. doi: 10.47371/mycosci.2022.07.004 (PMC10033251; doi:10.47371/mycosci.2022.07.004), 2022-09-30
Supplement: MYC-63-197-s02.pdf [file MYC-63-197-s02.pdf]

Supplementary Table S2. DNA sequences downloaded from GenBank and used for phylogenetic analyses.

| Species name                | Sample number        | Country     | Accession number of sequence |              |
|-----------------------------|----------------------|-------------|------------------------------|--------------|
|                             |                      |             | nuc rDNA ITS                 | <i>megBl</i> |
| <i>Tricholoma matsutake</i> | TM-31                | South Korea |                              | AB298300     |
| <i>T. matsutake</i>         | TN2                  | Norway      |                              | AB520980     |
| <i>T. matsutake</i>         | TN1                  | Norway      |                              | AB520979     |
| <i>T. matsutake</i>         | TN3                  | Norway      |                              | AB520981     |
| <i>T. matsutake</i>         | TnFIN1               | Finland     |                              | AB520982     |
| <i>T. matsutake</i>         | BH1                  | Bhutan      |                              | AB520959     |
| <i>T. matsutake</i>         | CH-JI1               | China       |                              | AB520961     |
| <i>T. matsutake</i>         | CH-HE3               | China       |                              | AB520960     |
| <i>T. matsutake</i>         | CH-YU1               | China       |                              | AB520963     |
| <i>T. matsutake</i>         | CH-SI1               | China       |                              | AB520962     |
| <i>T. matsutake</i>         | TM-9                 | China       |                              | AB298303     |
| <i>T. matsutake</i>         | 751                  | China       |                              | AB538240     |
| <i>T. matsutake</i>         | TF-R3                | Russia      |                              | AB520972     |
| <i>T. matsutake</i>         | TF-R4                | Russia      |                              | AB520973     |
| <i>T. matsutake</i>         | TF-R5                | Russia      |                              | AB520974     |
| <i>T. matsutake</i>         | NK05                 | North Korea |                              | AB298302     |
| <i>T. matsutake</i>         | NK02                 | North Korea |                              | AB298301     |
| <i>T. matsutake</i>         | Tn6                  | Japan       | AB188554                     |              |
| <i>T. matsutake</i>         | F1                   | Japan       |                              | AB298299     |
| <i>T. matsutake</i>         | TmY1                 | Japan       |                              | AB298298     |
| <i>T. matsutake</i>         | TmY4                 | Japan       |                              | AB293550     |
| <i>T. matsutake</i>         | TmNBRC6932-A01       | Japan       |                              | AB563496     |
| <i>T. matsutake</i>         | TmNBRC6933-B01       | Japan       |                              | AB563497     |
| <i>T. matsutake</i>         | Tm-029               | Japan       |                              | AB298297     |
| <i>T. matsutake</i>         | 12850                | Japan       |                              | AB538258     |
| <i>T. matsutake</i>         | TO-1                 | Japan       |                              | AB699617     |
| <i>T. magnivelare</i>       | MQ20-HL1613-QFB32585 | Canada      | MW628034                     |              |
| <i>T. magnivelare</i>       | NYSf2421             | USA         | LT220177                     |              |
| <i>T. murrillianum</i>      | SAT-00-283-55        | USA         | MW597239                     |              |
| <i>T. murrillianum</i>      | TM-10                | Canada      |                              | AB298306     |
| <i>T. murrillianum</i>      | Tp-C3                | Canada      |                              | AB293549     |
| <i>T. murrillianum</i>      | CA1                  | Canada      |                              | AB535196     |
| <i>T. mesoamericanum</i>    | FCME21585            | Mexico      | KX037037                     |              |
| <i>T. mesoamericanum</i>    | MX1                  | Mexico      |                              | AB520966     |
| <i>T. mesoamericanum</i>    | TM-4                 | Mexico      |                              | AB298305     |
| <i>T. mesoamericanum</i>    | TM-4                 | Mexico      |                              | AB298305     |
| <i>T. anatolicum</i>        | S-2-2-1              | Turkey      |                              | AB520967     |
| <i>T. anatolicum</i>        | S-2-3                | Turkey      |                              | AB520968     |
| <i>T. anatolicum</i>        | TM5                  | Morocco     |                              | AB520978     |
| <i>T. anatolicum</i>        | MC1                  | Morocco     |                              | AB298304     |
| <i>T. anatolicum</i>        | S-3-2-1              | Turkey      |                              | AB520969     |
| <i>T. dulciolens</i>        | H7002022             | Sweden      | AB738883                     |              |
| <i>T. dulciolens</i>        | 14633                | Italy       | JF908732                     |              |
| <i>T. ilkkae</i>            | SCM:B-4205           | Spain       | AB738881                     |              |
| <i>T. ilkkae</i>            | SCM:B-4346           | Spain       | AB738882                     |              |
| <i>T. focale</i>            | JV97239              | Sweden      | LT000166                     |              |
| <i>T. fulvocastaneum</i>    | rlc-567              | China       | MW421575                     |              |
| <i>T. fulvocastaneum</i>    | WK-N1                | Japan       |                              | AB520965     |
| <i>T. fulvocastaneum</i>    | NBRC                 | Japan       |                              | AB563499     |
| <i>T. bakamatsutake</i>     | 11543                | Japan       |                              | AB538257     |
| <i>T. bakamatsutake</i>     | SCMB81               | Spain       |                              | AB538242     |
| <i>T. caligatum</i>         | JV07451              | Spain       | LT000152                     |              |
