# Supplementary material for: New findings on the fungal species Tricholoma matsutake from Ukraine, and revision of its taxonomy and biogeography based on multilocus phylogenetic analyses
Source: PubMed Central journal article supplement — Mycoscience. 2022 Sep 30;63(5):197–214. doi: 10.47371/mycosci.2022.07.004 (PMC10033251; doi:10.47371/mycosci.2022.07.004), 2022-09-30
Supplement: MYC-63-197-s03.pdf [file MYC-63-197-s03.pdf]

Supplementary Table S3. Size of basidiospores and basidia

| Species                  | Specimen       | Country*          | Basidiospores |             |      |      |            |      |      |           |      | Basidia |      |             |      |      |            |       |       |  |
|--------------------------|----------------|-------------------|---------------|-------------|------|------|------------|------|------|-----------|------|---------|------|-------------|------|------|------------|-------|-------|--|
|                          |                |                   | N             | Length (µm) |      |      | Width (µm) |      |      | L/W ratio |      |         | N    | Length (µm) |      |      | Width (µm) |       |       |  |
|                          |                |                   |               | Min         | Av   | Max  | Min        | Av   | Max  | Min       | Av   | Max     |      | Min         | Av   | Max  | Min        | Av    | Max   |  |
| <i>T. matsutake</i>      | AY-2200915-001 | Ukraine (A/E)     | 160/214       | 6.63        | 7.16 | 9.0  | 4.4        | 5.31 | 6.1  | 1.17      | 1.32 | 1.57    | 30 > |             |      |      |            |       |       |  |
|                          | Ishida F-0315  | Sweden (A/E)      | 156/165       | 6.54        | 7.37 | 9.4  | 5.5        | 5.64 | 6.3  | 1.18      | 1.31 | 1.51    | 30 > |             |      |      |            |       |       |  |
|                          | AY-2040800-001 | Finland (A/E)     | 75/100        | 6.27        | 6.69 | 7.8  | 4.7        | 5.47 | 6.2  | 1.07      | 1.23 | 1.50    | 50   | 30.6        | 36.5 | 43.4 | 5.76       | 7.34  | 9.03  |  |
|                          | AY-2070925-001 | Finland (A/E)     | 95/100        | 5.97        | 7.19 | 9.9  | 4.6        | 5.56 | 8.3  | 1.04      | 1.30 | 1.83    | 100  | 31.1        | 41.1 | 50.3 | 4.42       | 7.42  | 11.76 |  |
|                          | AY-1981000-003 | North Korea (A/E) | 75/100        | 6.30        | 6.84 | 8.8  | 4.8        | 5.61 | 7.1  | 1.06      | 1.22 | 1.45    | 100  | 25.8        | 37.6 | 59.7 | 5.59       | 7.94  | 12.30 |  |
|                          | AY-1981000-001 | Japan (A/E)       | 75/100        | 6.12        | 6.51 | 7.7  | 4.6        | 5.51 | 6.5  | 1.04      | 1.19 | 1.35    | 100  | 25.9        | 32.9 | 42.6 | 6.30       | 7.39  | 10.51 |  |
|                          | AY-2051104-001 | Japan (A/E)       | 95/100        | 6.15        | 7.04 | 8.4  | 4.6        | 5.27 | 6.2  | 1.06      | 1.34 | 1.48    | 50   | 22.8        | 33.0 | 44.8 | 5.16       | 7.02  | 9.64  |  |
|                          | AY-2051104-002 | Japan (A/E)       | 95/100        | 6.13        | 6.81 | 7.8  | 4.3        | 5.22 | 6.7  | 1.02      | 1.32 | 1.64    | 100  | 24.5        | 35.1 | 49.1 | 5.59       | 7.61  | 11.93 |  |
|                          | AY-2051104-003 | Japan (A/E)       | 75/100        | 6.13        | 6.89 | 9.3  | 4.1        | 5.29 | 6.3  | 1.09      | 1.31 | 1.63    | 75   | 24.6        | 37.2 | 51.1 | 4.79       | 6.94  | 9.34  |  |
|                          | AY-2071023-002 | Japan (A/E)       | 95/100        | 5.76        | 6.59 | 7.7  | 4.3        | 5.08 | 6.0  | 1.08      | 1.30 | 1.51    | 100  | 32.3        | 39.5 | 49.5 | 5.49       | 7.14  | 9.17  |  |
|                          | AY-2131013-001 | Japan (A/E)       | 152/161       | 6.98        | 7.73 | 9.3  | 5.32       | 5.94 | 7.0  | 1.16      | 1.30 | 1.59    | 30 > |             |      |      |            |       |       |  |
|                          | AY-2041007-002 | Japan (A/E)       | 95/100        | 6.33        | 6.96 | 7.9  | 4.7        | 5.34 | 5.9  | 1.16      | 1.31 | 1.52    | 100  | 31.8        | 42.2 | 52.2 | 6.74       | 7.83  | 9.10  |  |
|                          | AY-2041007-001 | Japan (A/E)       | 95/100        | 5.93        | 6.73 | 8.9  | 4.2        | 5.14 | 6.6  | 1.18      | 1.31 | 1.53    | 100  | 31.5        | 39.7 | 49.6 | 7.14       | 8.02  | 9.47  |  |
|                          | AY-2021027-001 | Japan (A/E)       | 95/100        | 7.06        | 7.87 | 9.8  | 5.1        | 5.76 | 6.8  | 1.20      | 1.37 | 1.56    | 100  | 32.1        | 40.2 | 47.5 | 6.84       | 7.80  | 9.57  |  |
|                          | AY-2071101-001 | Japan (A/E)       | 95/100        | 6.22        | 6.83 | 7.7  | 4.9        | 5.49 | 6.1  | 1.09      | 1.24 | 1.39    | 100  | 36.1        | 42.2 | 47.7 | 5.76       | 7.27  | 8.66  |  |
|                          | AY-2040400-001 | Bhutan (B/C)      | 95/100        | 6.30        | 7.27 | 9.9  | 4.7        | 5.52 | 7.1  | 1.13      | 1.32 | 1.59    | 100  | 27.9        | 35.5 | 45.4 | 5.73       | 6.94  | 8.86  |  |
|                          | AY-1981000-002 | Bhutan (B/C)      | 30 >          |             |      |      |            |      |      |           |      |         | 30 > |             |      |      |            |       |       |  |
|                          | AY-1980831-001 | China (B/C)       | 75/100        | 6.40        | 7.26 | 9.5  | 5.0        | 5.90 | 7.6  | 1.08      | 1.24 | 1.64    | 50   | 26.1        | 37.8 | 45.7 | 5.29       | 7.43  | 9.74  |  |
| AY-1981000-001           | China (B/C)    | 95/100            | 6.07          | 7.43        | 10.3 | 4.8  | 6.05       | 9.6  | 1.02 | 1.23      | 1.54 | 100     | 27.4 | 41.0        | 51.6 | 5.66 | 7.50       | 10.08 |       |  |
| <i>T. bakamatsutake</i>  | AY-2041007-003 | Japan             | 95/100        | 4.65        | 5.32 | 6.7  | 3.44       | 4.10 | 5.0  | 1.07      | 1.30 | 1.58    | 100  | 21.6        | 31.2 | 41.2 | 6.13       | 7.11  | 8.73  |  |
|                          | AY-2071001-002 | Japan             | 168/177       | 5.34        | 5.83 | 6.7  | 4.13       | 4.64 | 5.5  | 1.13      | 1.26 | 1.44    | 30 > |             |      |      |            |       |       |  |
|                          | AY-2080800-001 | China             | 95/100        | 5.14        | 5.90 | 6.6  | 3.9        | 4.57 | 5.3  | 1.10      | 1.29 | 1.48    | 30 > |             |      |      |            |       |       |  |
| <i>T. fulvocastaneum</i> | AY-2091112-001 | Japan             | 170/179       | 6.31        | 6.91 | 8.2  | 4.68       | 5.31 | 6.3  | 1.15      | 1.30 | 1.54    | 30 > |             |      |      |            |       |       |  |
| <i>T. magnivelare</i>    | AY-2080307-001 | Canada            | 152/160       | 6.84        | 7.55 | 9.1  | 4.79       | 5.49 | 6.7  | 1.20      | 1.38 | 1.57    | 30 > |             |      |      |            |       |       |  |
| <i>T. murrillianum</i>   | AY-2080100-001 | Canada            | 75/100        | 5.90        | 6.55 | 7.7  | 4.35       | 5.03 | 5.7  | 1.16      | 1.30 | 1.58    | 100  | 36.5        | 46.4 | 58.7 | 5.97       | 7.12  | 8.63  |  |
|                          | AY-2071018-001 | Canada            | 75/100        | 6.00        | 6.81 | 10.1 | 4.31       | 5.18 | 6.94 | 1.08      | 1.32 | 1.63    | 100  | 25.4        | 40.3 | 10.1 | 5.19       | 6.92  | 6.94  |  |
| <i>T. mesoamericanum</i> | AY-1981000-004 | Mexico            | 95/127        | 5.76        | 6.48 | 9.27 | 4.18       | 5.22 | 7.41 | 1.05      | 1.25 | 1.56    | 100  | 30.1        | 39.8 | 50.7 | 5.49       | 7.27  | 9.64  |  |
| <i>T. anaticum</i>       | AY-2061109-001 | Turkey            | 95/100        | 5.93        | 6.94 | 9.3  | 4.18       | 5.41 | 7.35 | 1.02      | 1.29 | 1.64    | 100  | 17.1        | 31.4 | 49.5 | 4.85       | 6.69  | 9.71  |  |
|                          | AY-2061108-004 | Turkey            | 75/100        | 6.03        | 6.70 | 7.68 | 4.21       | 5.47 | 7.14 | 1.01      | 1.23 | 1.59    | 100  | 24.9        | 35.4 | 48.9 | 4.08       | 8.11  | 12.44 |  |
|                          | AY-2061109-002 | Turkey            | 95/100        | 5.76        | 6.75 | 8.22 | 4.21       | 5.20 | 6.47 | 1.12      | 1.30 | 1.53    | 30 > |             |      |      |            |       |       |  |
|                          | AY-1981000-005 | Morocco           | 95/100        | 6.46        | 7.29 | 8.8  | 4.27       | 5.09 | 6.23 | 1.23      | 1.44 | 1.74    | 100  | 24.7        | 36.9 | 52.9 | 4.08       | 6.39  | 8.76  |  |
|                          | AY-1981000-006 | Morocco           | 95/100        | 6.54        | 7.31 | 8.46 | 4.19       | 5.01 | 5.73 | 1.27      | 1.47 | 1.75    | 75   | 27.0        | 36.5 | 50.7 | 5.43       | 6.72  | 10.85 |  |

\*A/C and B/C in parenthesis mean phylogenetic clades as shown in Figs 4 and 5.
