# Supplementary material for: New findings on the fungal species Tricholoma matsutake from Ukraine, and revision of its taxonomy and biogeography based on multilocus phylogenetic analyses
Source: PubMed Central journal article supplement — Mycoscience. 2022 Sep 30;63(5):197–214. doi: 10.47371/mycosci.2022.07.004 (PMC10033251; doi:10.47371/mycosci.2022.07.004), 2022-09-30
Supplement: MYC-63-197-s07.pdf [file MYC-63-197-s07.pdf]

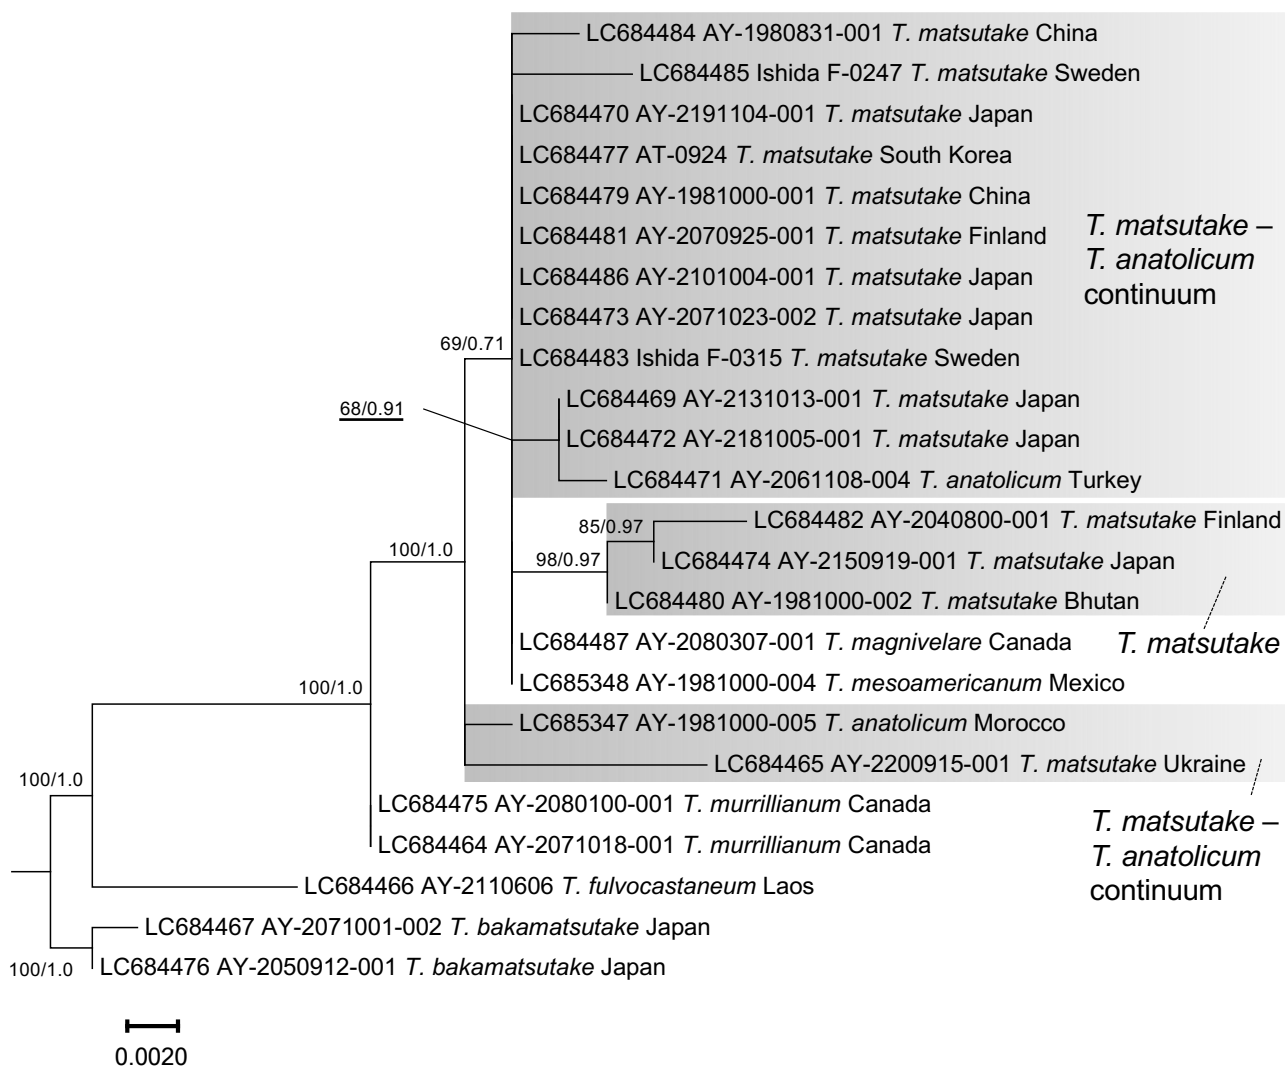

Supplementary Fig. S4 – ML phylogenetic tree of the mt rDNA SSU region of *Tricholoma matsutake* and closely related species in the section Caligata. Bootstrap (BS) values > 60% from ML trees (left) and Bayesian posterior probabilities (PP) > 0.60 (right) are shown near the nodes. Thick nodes indicate significant support by both the BS (> 85%) and PP (> 1.0) values. Taxon names in bold indicate the specimens examined in this study.
